# Supplementary material
Source: MDPI journal article supplement (https://www.mdpi.com/2072-4292/16/10/1793)
Supplement: s1 [file s1]

# SUPPLEMENTARY MATERIAL

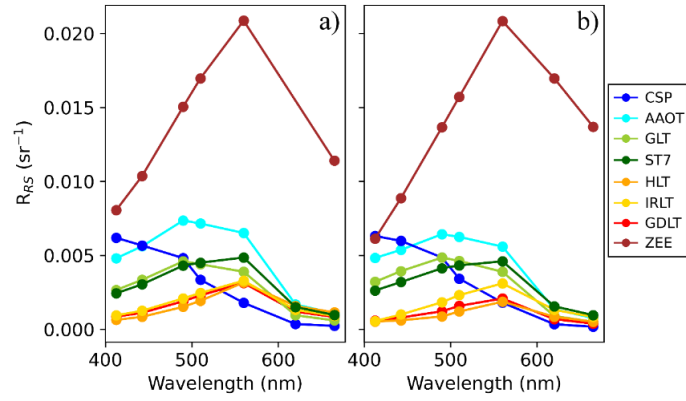

**Figure S1.** Mean spectral  $R_{RS}(\lambda)$  values at the various AERONET-OC sites from *in situ* (a) and OLCI S3A and S3B (b) data.

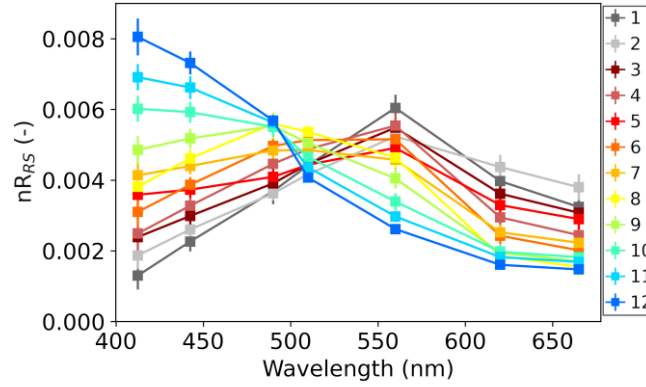

**Figure S2.** Mean and standard deviation values of the 12 clusters identified by ISODATA from OLCI  $nR_{RS}(\lambda)$  spectra at all the coastal European AERONET-OC sites obtained with alternative parametrization.

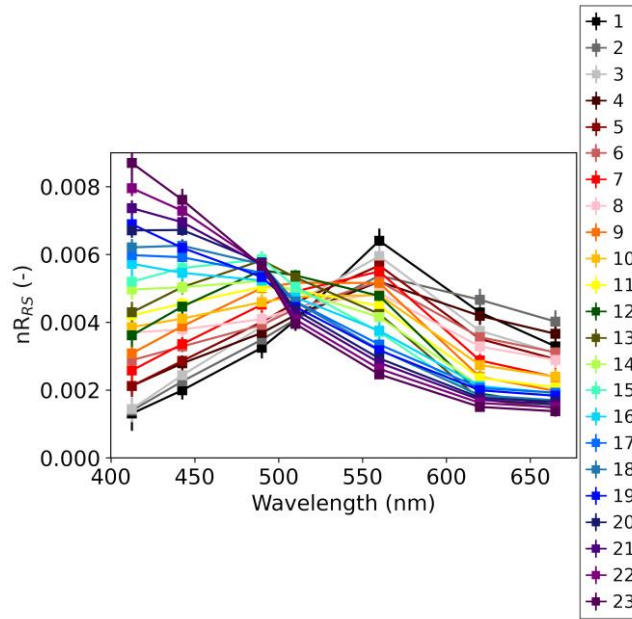

**Figure S3.** Mean and standard deviation values of the 23 clusters identified by ISODATA from OLCI  $nR_{RS}(\lambda)$  spectra at all the coastal European AERONET-OC sites obtained with alternative parametrization.

**Table S1.** Mean ( $\pm$  standard deviation) weighted values of Sun zenith angle (SZA), viewing zenith angle (OZA) from OLCI

data and aerosol optical thickness at 865 nm (AOT) from AERONET-OC data for S3A match-ups.

| <i>c</i> | <i>SZA</i> (°) | <i>OZA</i> (°) | <i>AOT</i>   |
|----------|----------------|----------------|--------------|
| 1        | 43 (±8)        | 29 (±13)       | 0.04 (±0.02) |
| 2        | 46 (±8)        | 24 (±13)       | 0.06 (±0.03) |
| 3        | 44 (±7)        | 24 (±14)       | 0.05 (±0.03) |
| 4        | 43 (±9)        | 26 (±15)       | 0.05 (±0.03) |
| 5        | 45 (±8)        | 19 (±14)       | 0.05 (±0.03) |
| 6        | 44 (±12)       | 26 (±15)       | 0.06 (±0.03) |
| 7        | 46 (±11)       | 22 (±15)       | 0.06 (±0.03) |
| 8        | 44 (±11)       | 24 (±14)       | 0.06 (±0.04) |
| 9        | 44 (±11)       | 21 (±15)       | 0.07 (±0.03) |
| 10       | 48 (±12)       | 21 (±15)       | 0.07 (±0.04) |
| 11       | 49 (±13)       | 27 (±16)       | 0.06 (±0.04) |
| 12       | 52 (±14)       | 24 (±14)       | 0.04 (±0.02) |
| 13       | 51 (±12)       | 24 (±15)       | 0.05 (±0.02) |
| 14       | 45 (±8)        | 22 (±15)       | 0.07 (±0.04) |
| 15       | 42 (±6)        | 20 (±15)       | 0.06 (±0.03) |

**Table S2.** Mean (± standard deviation) weighted values of Sun zenith angle (SZA), viewing zenith angle (OZA) from OLCI data and aerosol optical thickness at 865 nm (AOT) from AERONET-OC data for S3B match-ups.

| <i>c</i> | <i>SZA</i> (°) | <i>OZA</i> (°) | <i>AOT</i>   |
|----------|----------------|----------------|--------------|
| 1        | 44 (±8)        | 30 (±14)       | 0.05 (±0.03) |
| 2        | 43 (±5)        | 24 (±14)       | 0.06 (±0.03) |
| 3        | 44 (±6)        | 22 (±14)       | 0.04 (±0.02) |
| 4        | 43 (±10)       | 23 (±15)       | 0.05 (±0.03) |
| 5        | 46 (±9)        | 19 (±15)       | 0.05 (±0.02) |
| 6        | 43 (±11)       | 26 (±16)       | 0.06 (±0.03) |
| 7        | 46 (±10)       | 21 (±15)       | 0.06 (±0.03) |
| 8        | 43 (±10)       | 24 (±15)       | 0.06 (±0.03) |
| 9        | 43 (±11)       | 22 (±15)       | 0.06 (±0.03) |
| 10       | 48 (±11)       | 23 (±14)       | 0.06 (±0.03) |
| 11       | 52 (±13)       | 27 (±15)       | 0.05 (±0.04) |
| 12       | 53 (±13)       | 27 (±16)       | 0.04 (±0.02) |
| 13       | 50 (±13)       | 26 (±15)       | 0.05 (±0.03) |
| 14       | 42 (±10)       | 27 (±15)       | 0.06 (±0.03) |
| 15       | 40 (±7)        | 28 (±16)       | 0.07 (±0.03) |
